# Supplementary material for: Bismuth-doped La1.75Sr0.25NiO4+δ as a novel cathode material for solid oxide fuel cells
Source: Royal Society of Chemistry journal article supplement (doi:10.1039/c7ta03381h), 2017-01-01
Supplement: c7ta03381h1.pdf [file c7ta03381h1.pdf]

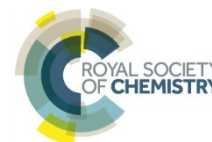

Journal Name

ARTICLE

Received 00th January 20xx,  
Accepted 00th January 20xx

DOI: 10.1039/x0xx00000x

[www.rsc.org/](http://www.rsc.org/)

## Bismuth-doped $\text{La}_{1.75}\text{Sr}_{0.25}\text{NiO}_{4+\delta}$ as novel cathode material for solid oxide fuel cells

Zhesheng Zhu,<sup>a</sup> Mei Li,<sup>a</sup> Changrong Xia<sup>\*a</sup> and Henny J. M.  
Bouwmeester<sup>\*ab</sup>

Supporting Information

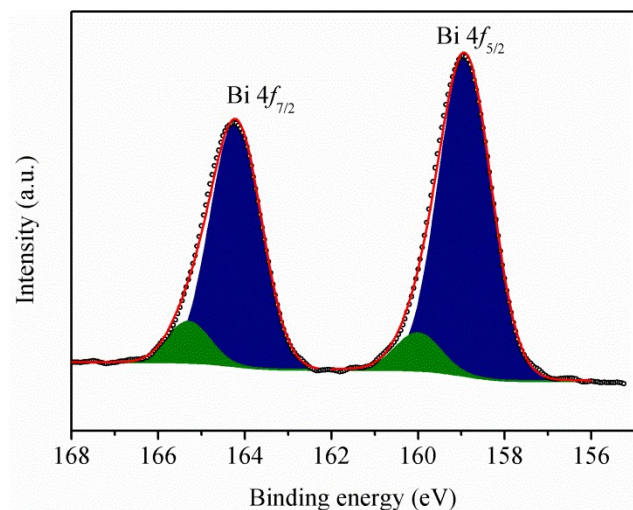

**Figure S1.** Experimental and deconvoluted Bi 4f XPS spectra of LSN-Bi. The blue and green peaks denote the contributions from Bi<sup>3+</sup> and Bi<sup>5+</sup>, respectively. The red line gives the fitted envelope of both components. Binding energies and relative intensities are given in Table S1.

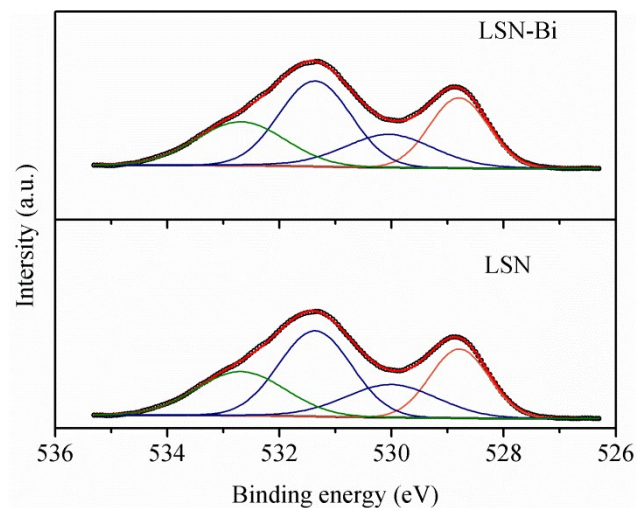

**Figure S2.** Experimental and deconvoluted O 1s XPS spectra for LSN and LSN-Bi. The red line gives the fitted envelope of all four components. Binding energies and relative intensities are given in Table S2.

**Table S1.** Binding energies (BE) and relative intensities for the Bi 4f region of LSN-Bi. Intensities are relative to the intensity of the envelope of both components.

|                      | BE<br>(eV) | Relative<br>Intensity<br>(%) |  | BE<br>(eV) | Relative<br>Intensity<br>(%) |
|----------------------|------------|------------------------------|--|------------|------------------------------|
|                      |            | Bi <sup>3+</sup>             |  |            | Bi <sup>5+</sup>             |
| Bi 4f <sub>5/2</sub> | 158.90     | 91.1                         |  | 160        | 8.9                          |
| Bi 4f <sub>7/2</sub> | 164.20     | 87.8                         |  | 165.30     | 12.2                         |

**Table S2.** Binding energies (BE) and relative intensities for the O 1s region of LSN and LSN-Bi. Intensities are relative to the intensity of the envelope of all four oxygen species.

|                                              | LSN        |                              | LSN-Bi     |                                |
|----------------------------------------------|------------|------------------------------|------------|--------------------------------|
| Oxygen species                               | BE<br>(eV) | Relative<br>Intensity<br>(%) | BE<br>(eV) | Relative<br>Intensities<br>(%) |
| O <sup>2-</sup>                              | 528.79     | 23.3                         | 528.80     | 23.6                           |
| O <sub>2</sub> <sup>2-</sup> /O <sup>-</sup> | 530.01     | 18.2                         | 530.05     | 18.7                           |
| OH                                           | 531.36     | 35.86                        | 531.36     | 35.41                          |
| H <sub>2</sub> O                             | 532.69     | 22.58                        | 532.69     | 22.23                          |
